# Supplementary material
Source: ML conference proceedings conference paper supplement (https://openaccess.thecvf.com/content/WACV2025/html/Zhong_Rethinking_Low-Rank_Adaptation_WACV_2025_paper.html)
Supplement: Supplementary file 1 [file Zhong_Rethinking_Low-Rank_Adaptation_WACV_2025_supplemental.pdf]

## Appendix

### A. Heart-LoRA with More Granularity

As mentioned earlier, the original Heart-LoRA uses layer-by-layer accumulation to calculate responsiveness. This approach ensures that the responsiveness of each head is considered globally. However, directly calculating responsiveness at each layer and applying deactivation is also worth exploring. Therefore, we propose a variant of Heart-LoRA that directly calculate responsiveness at each layer and then perform the deactivation at layer level. We term this variant as Heart-LoRA<sup>†</sup> and present its results in Table 3.

From the results, it can be seen that the layer-by-layer implementation of Heart-LoRA<sup>†</sup> also performs well, outperforming LoRA by 0.6%. We argue that this is due to our proposed responsiveness calculation algorithm, where the responsiveness of the heads acts on the local layer, which could potentially yield better results in certain tasks. Overall, both Heart-LoRA<sup>†</sup> and the original Heart-LoRA significantly outperform LoRA and generally require fewer parameters to function.

### B. On Hierarchical Transformers

We also apply our method on Swin Transformer [18], a widely adopted and representative design of hierarchical structures of transformers aiming to improve ViT’s computational efficiency.

Given that the number of heads and dimension of token is different across layers, simply setting a  $ne$  hyper-parameter is not enough. Instead, we set a hyper-parameter  $ratio$  indicating the percentage of heads to deactivate in the window attention. The accumulation of responsiveness  $R$  and thus the candidate  $C$  for swin transformer is restricted in layers with the same number of attention heads in this

| Method                  | Average             | Natural             | Specialized         | Structured          |
|-------------------------|---------------------|---------------------|---------------------|---------------------|
| Full                    | 68.9                | 75.9                | 83.4                | 47.6                |
| LoRA                    | 76.4                | 81.5                | 85.2                | 62.6                |
| Heart-LoRA <sup>†</sup> | <b>76.8</b> (↑ 0.4) | <b>81.7</b> (↑ 0.2) | <b>85.8</b> (↑ 0.6) | <b>63.0</b> (↑ 0.4) |

Table 3. Results on VTAB-1K of Heart-LoRA<sup>†</sup>, using a layer by layer deployment of the calculation in section 3.

| Method     | Average               | Natural             | Specialized         | Structured          |
|------------|-----------------------|---------------------|---------------------|---------------------|
| Full       | 74.99                 | 79.2                | 86.2                | 59.7                |
| Linear     | 62.60                 | 73.5                | 80.8                | 33.5                |
| VPT-Deep   | 71.55                 | 76.8                | 84.5                | 53.4                |
| Bi-LoRA    | 76.67                 | 82.0                | 86.8                | 61.2                |
| Heart-LoRA | <b>76.93</b> (↑ 0.26) | <b>82.3</b> (↑ 0.3) | <b>87.1</b> (↑ 0.3) | <b>61.4</b> (↑ 0.2) |

Table 4. Results on VTAB-1K using Swin-B as backbone, reported accuracy from average, natural, specialized and structured.

case, which makes sense since layers with the same number of attention heads generally are in the same hierarchy of Swin Transformer.

We use Swin-B as our backbone following [15]. It consists of four stages, with depths {2, 2, 18, 2} and number of heads {4, 8, 16, 32}. In this case, take  $ratio = 0.25$  as an example, we set the number of candidate of deactivation  $C$  for the four stages separately as {1, 2, 4, 8}. While in many tasks, the deeper the layer is, it learns more task specific information, setting a fixed number of heads also proves to be effective since it discard little information in deeper layer while discarding much information in shallower layer where more redundancy persists.

The results are shown in Table 4, using **swin-B** pre-trained on ImageNet-21K [4] as backbone for Heart-LoRA. Following [15] [14], we compare Heart-LoRA with several methods which could also be applied on swin transformer: Full, Linear, VPT [11] and Bi-LoRA [15]. From the results, we observe that Heart-LoRA achieve high performance in Swin Transformer even with only very few hyper-parameter settings, showcasing its versatility across different transformer designs. While the performance may be sub-optimal compared to ViT, there is potential for further improvement as our experiments were conducted in only a limited number of cases. Additionally, our method on Swin-B also demonstrates that Heart-LoRA is structure-agnostic and method-agnostic, indicating its potential to enhance performance across various architectures.

### C. Full Ablation on Number of Heads

We provide a comprehensive analysis of the impact of  $ne$  settings on performance. We selected 16 datasets, which essentially encompass all types of tasks in the VTAB-1K benchmark. For each dataset, we varied the value of  $ne$  and tracked the corresponding performance. Since we are using ViT-B, which has 12 heads, the values for  $ne$  were set at 1, 3, 5, 7, 9, 11 to provide more data points. The results are in Fig 8.

The results show a general trend where increasing  $ne$  leads to a decrease in performance. However, the degree of this decrease is not linear; in many datasets, we observed that the performance drop after increasing  $ne$  is not significant (like in Cifar100 and dSpr-Ori), and in some cases the performance even improves (EuroSAT and SVHN). We argue that this phenomenon is due to the inherent redundancy among all the heads in the multi-head self-attention mechanism, where some heads have minimal responsiveness (defined in section 1) and thus contribute little to the current task. Since Heart-LoRA can accurately identify these minimally responsive heads and deactivate them accordingly, the performance does not drop significantly, and in many datasets, it even improves.

However, when  $ne$  is large, such as  $ne = 9$  or  $ne = 11$ ,

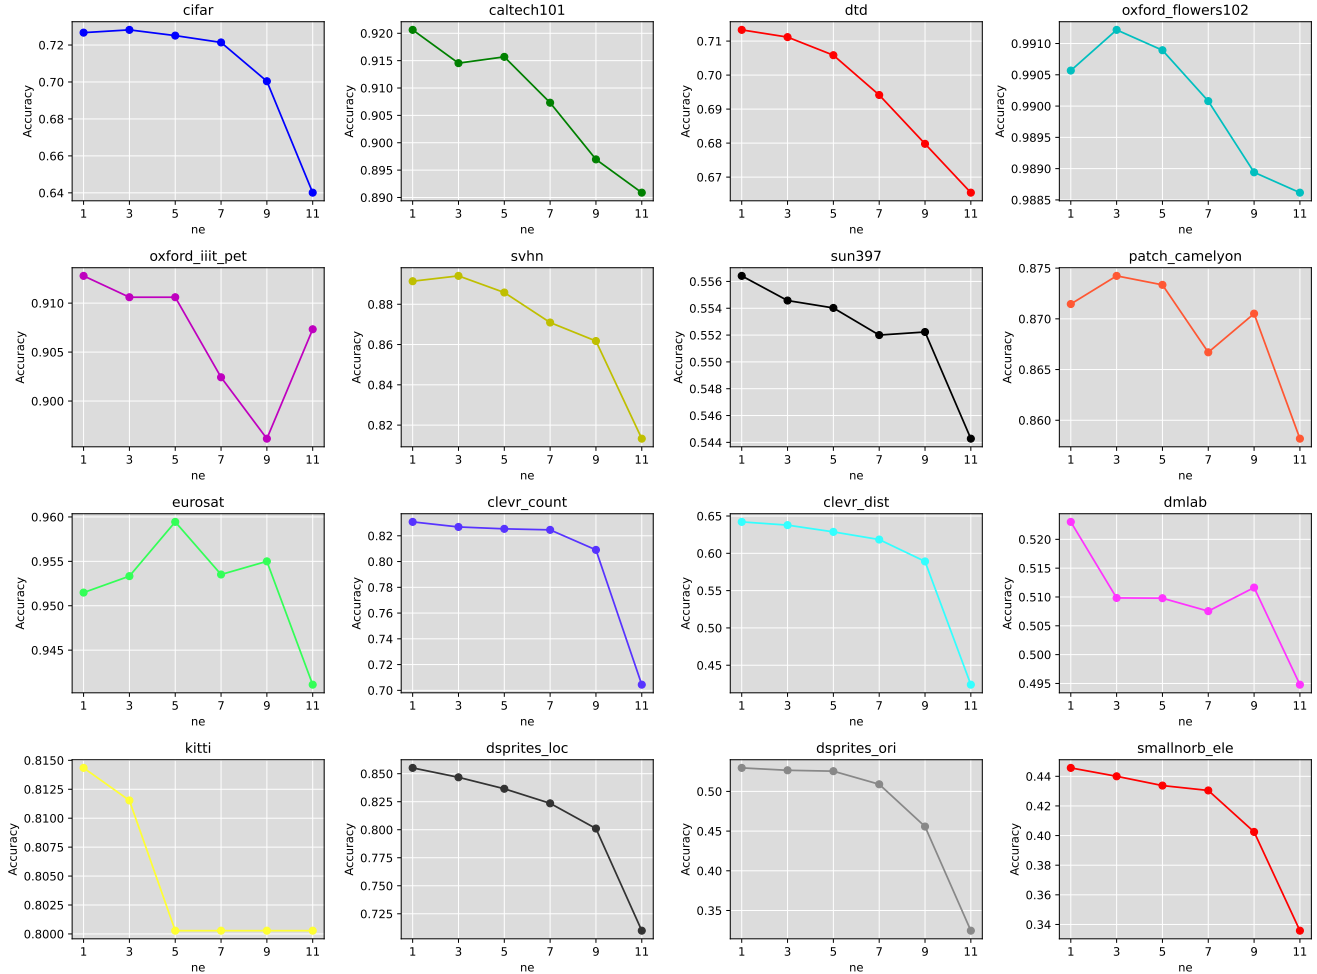

Figure 8. Full ablation results on the effect of  $ne$  on different datasets in VTAB-1K benchmark.

more than half of the heads are deactivated. At this point, performance generally experiences significant degradation. This is because deactivating too many heads also deactivates those with high responsiveness, thus discarding their contributions.

Finally, we can see that the  $ne$  value that yields the highest performance varies across different datasets, which validates that the degree of redundancy varies with the task, and thus the pattern of heads that Heart-LoRA should identify and deactivate is distinct across tasks. This confirms the ability of Heart-LoRA to uniquely discover task-specific patterns for different tasks.

## D. Other Ways to Obtain Responsiveness

Although we utilized Taylor expansion in the section 3 to calculate responsiveness, it is feasible to use other simpler and more straightforward methods as well. Here, we present the results of calculating responsiveness using two

criteria: the L2 norm of weight with one parameter or the L2 norm of gradient, as shown in Table 5.

From the results, we can observe that using Heart-LoRA<sup>†</sup>, we still manage to surpass LoRA and match Bi-LoRA. Considering this was achieved with a search between  $ne$  values of only 1 and 3, it is quite impressive. This outcome stems from the unique adaptation process of Heart-LoRA, which identify the redundant heads and deactivate them during fine-tuning. However, it is noted that this re-

| Method                           | Average | Natural | Specialized | Structured |
|----------------------------------|---------|---------|-------------|------------|
| Full                             | 68.9    | 75.9    | 83.4        | 47.6       |
| LoRA                             | 76.4    | 81.5    | 85.2        | 62.6       |
| Heart-LoRA <sup>†</sup> (weight) | 76.7    | 81.6    | 85.8        | 62.5       |
| Heart-LoRA <sup>†</sup> (grad)   | 76.7    | 81.6    | 85.5        | 63.0       |

Table 5. Results on VTAB-1K of Heart-LoRA<sup>†</sup>, using L2 norm of weight (denoted as weight) or L2 norm of gradient (denoted as grad) to calculate the responsiveness.

sult does not outperform the effectiveness of Heart-LoRA<sup>†</sup> using Taylor expansion, which underscores the superiority of approach from the section 3. By considering both weight and gradient simultaneously, it allows for the identification of heads with truly minimal responsiveness, thereby reducing the risk of misidentification.

## E. Comparison to Arbitrary Deactivation

We compare the results of the arbitrary deactivation approach adopted in section 4.3.1 with Heart-LoRA. The results are presented in Table 6. As we can see, although the arbitrary mask performs quite well, exceeding LoRA by roughly 0.5%, it still underperforms Heart-LoRA by 0.3%, which is notable. This indicates that the performance gain of Heart-LoRA is not only due to the structural advantage of head deactivation but also stems from the unique advantage of using responsiveness to cleverly identify unimportant heads.

While there is improvement when utilizing arbitrary deactivation, we did not utilize the property of head redundancy to the extreme as we were arbitrarily selecting heads to deactivate and ignore the fact that *head-level responsiveness varies across tasks*, as discussed in section 4.3.2. One option to maximize the performance is to study the attention patterns for each downstream task manually. However, manually studying the patterns is not feasible when dealing with a significant amount of downstream tasks for its huge computational cost. This leads us to seek methods capable of efficiently identifying deactivation candidates in the study of PETL without the need for manual investigation, and this brings us to our proposed Heart-LoRA which utilize task-specific responsiveness to cleverly recognize unimportant heads to deactivate.

| Method     | Average      | Natural      | Specialized  | Structured   |
|------------|--------------|--------------|--------------|--------------|
| Full       | 68.9         | 75.9         | 83.4         | 47.6         |
| LoRA       | 76.4         | 81.5         | 85.2         | 62.6         |
| Front      | 76.9         | 81.7         | 85.8         | 63.3         |
| Heart-LoRA | 77.2 (↑ 0.3) | 81.8 (↑ 0.1) | 86.2 (↑ 0.4) | 63.5 (↑ 0.2) |

Table 6. Comparison between using arbitrary deactivation and the original Heart-LoRA.

## F. Experimental details

### F.1. Actual Implementation

The core of Heart-LoRA lies in obtaining a task-specific mask, with the actual code implementation in Alg. 1:

### F.2. Backbones

### F.3. Implementation Environment

On a single NVIDIA RTX 4090 GPU with OS being Ubuntu 22.04.3 LTS x86\_64, we conduct all experiments

**Algorithm 1:** Implementation of obtaining the mask using PyTorch. The obtained mask is then used to perform the deactivation of heads.

```

1 def get_scores(args, adapter, num_of_heads
  =12):
2     weight = get_weight(adapter)
3     grad = get_grad(adapter)
4     step = weight.shape[1] // 12
5     all_weights = [weight[:, i:i + step] for
  i in range(num_of_heads)]
6     all_grads = [grad[:, i:i + step] for i in
  range(num_of_heads)]
7     scores = [get_score(all_weights[i],
  all_grads[i]) for i in range(num_of_heads
  )]
8     return scores
9
10 def get_mask(args, adapter, mask, ne):
11     scores = get_scores(args, adapter, 12)
12     scores_tensor = torch.tensor(scores)
13     _, indices = torch.topk(scores_tensor, ne
  , largest=False)
14     indices_list = indices.tolist()
15     for i in indices_list:
16         mask[:, :, i, :, :] = 0
17     return mask

```

| Model        | Pre-Training Dataset | Size (M) | Pre-Trained Weights |
|--------------|----------------------|----------|---------------------|
| ViT-B/16 [5] | ImageNet-21K         | 85.8     | checkpoint          |
| Swin-B [18]  | ImageNet-21K         | 86.7     | checkpoint          |

Table 7. Pre-Trained backbones.

using *PyTorch* and *timm* library.

## F.4. Data Augmentation

### F.4.1 VTAB-1K

Following [15], we simply adjust the image dimensions to  $224 \times 224$ .

### F.4.2 Few-shot Learning

Also following [34] and [15], we apply color-jitter and RandAugmentation to the training samples. For the validation/test samples, we first resize them to  $256 \times 256$ , then center-crop them to  $224 \times 224$ , and finally normalize them using the mean and standard deviation of ImageNet.

## F.5. Hyper-parameter

Following [15], we continue to employ a scaling parameter  $s$ . Specifically, our search for  $s$  is conducted within the set  $\{0.01, 0.1, 1.0, 10, 100\}$ . Other hyper-parameters are in Table 9, which is basically the same as those in [15]

and [34]. More information about the datasets used is provided in Table 8. For parameters  $ne$ , when the head-level deactivation of Heart-LoRA result in performance degradation, we simply opt for a hyper-parameter setting of  $ne = 0$ . In this scenario, no information is discarded and  $P$  is simply all ones.

|          | Dataset              | #Classes | Train                      | Val    | Test   |
|----------|----------------------|----------|----------------------------|--------|--------|
|          | CIFAR100             | 100      |                            |        | 10,000 |
|          | Caltech101           | 102      |                            |        | 6,084  |
|          | DTD                  | 47       |                            |        | 1,880  |
|          | Oxford-Flowers102    | 102      |                            |        | 6,149  |
|          | Oxford-Pets          | 37       |                            |        | 3,669  |
|          | SVHN                 | 10       |                            |        | 26,032 |
|          | Sun397               | 397      |                            |        | 21,750 |
|          | Patch Camelyon       | 2        |                            |        | 32,768 |
|          | EuroSAT              | 10       |                            |        | 5,400  |
| VTAB-1k  | Resisc45             | 45       | 800/1,000                  | 200    | 6,300  |
|          | Retinopathy          | 5        |                            |        | 42,670 |
|          | Clevr/count          | 8        |                            |        | 15,000 |
|          | Clevr/distance       | 6        |                            |        | 15,000 |
|          | DMLab                | 6        |                            |        | 22,735 |
|          | KITTI-Dist           | 4        |                            |        | 711    |
|          | dSprites/location    | 16       |                            |        | 73,728 |
|          | dSprites/orientation | 16       |                            |        | 73,728 |
|          | SmallNORB/azimuth    | 18       |                            |        | 12,150 |
|          | SmallNORB/elevation  | 18       |                            |        | 12,150 |
|          | Food-101             | 101      |                            | 20,200 | 30,300 |
|          | Stanford Cars        | 196      |                            | 1,635  | 8,041  |
| Few-shot | Oxford-Flowers102    | 102      | $(1/2/4/8/16)*(\#Classes)$ | 1,633  | 2,463  |
|          | FGVC-Aircraft        | 100      |                            | 3,333  | 3,333  |
|          | Oxford-Pets          | 37       |                            | 736    | 3,669  |

Table 8. **Dataset Details.**

|                   | optimizer | batch size | learning rate | weight decay | # epochs | lr decay | # warm-up epochs |
|-------------------|-----------|------------|---------------|--------------|----------|----------|------------------|
| VTAB-1K           | AdamW     | 64         | 1e-3          | 1e-4         | 100      | cosine   | 10               |
| Few-shot learning | AdamW     | 64         | 5e-3          | 1e-4         | 100      | cosine   | 10               |

Table 9. **Other Hyper-parameters.**
